# Supplementary material for: Lipid nanoparticles with PEG-variant surface modifications mediate genome editing in the mouse retina
Source: PubMed Central journal article supplement (PMC10575971; doi:10.1038/s41467-023-42189-3), 2023-10-13
Supplement: 41467_2023_42189_MOESM1_ESM.pdf [file 41467_2023_42189_MOESM1_ESM.pdf]

## **Supplementary Information**

### **Lipid nanoparticles with PEG-variant surface modifications mediate genome editing in the mouse retina**

Milan Gautam<sup>a</sup>, Antony Jozic<sup>a</sup>, Grace Li-Na Su<sup>b</sup>, Marco Herrera-Barrera<sup>a</sup>, Allison Curtis<sup>b</sup>, Sebastian Arrizabalaga<sup>b</sup>, Wayne Tschetter<sup>b</sup>, Renee C. Ryals<sup>b\*</sup>, Gaurav Sahay<sup>a,b,c\*</sup>

<sup>a</sup>Department of Pharmaceutical Sciences, College of Pharmacy, Robertson Life Sciences Building, Oregon State University, Portland, Oregon, 97201, USA

<sup>b</sup>Department of Ophthalmology, Casey Eye Institute, Oregon Health & Science University, Portland, Oregon, 97239, USA

<sup>c</sup>Department of Biomedical Engineering, Robertson Life Sciences Building, Oregon Health & Science University, Portland, Oregon, 97201, USA

\*Correspondence to: Gaurav Sahay; email: [sahay@ohsu.edu](mailto:sahay@ohsu.edu)  
Renee C. Ryals; email: [ryals@ohsu.edu](mailto:ryals@ohsu.edu)

This file includes:

Supplementary Figures 1-7

Supplementary Tables 1-4

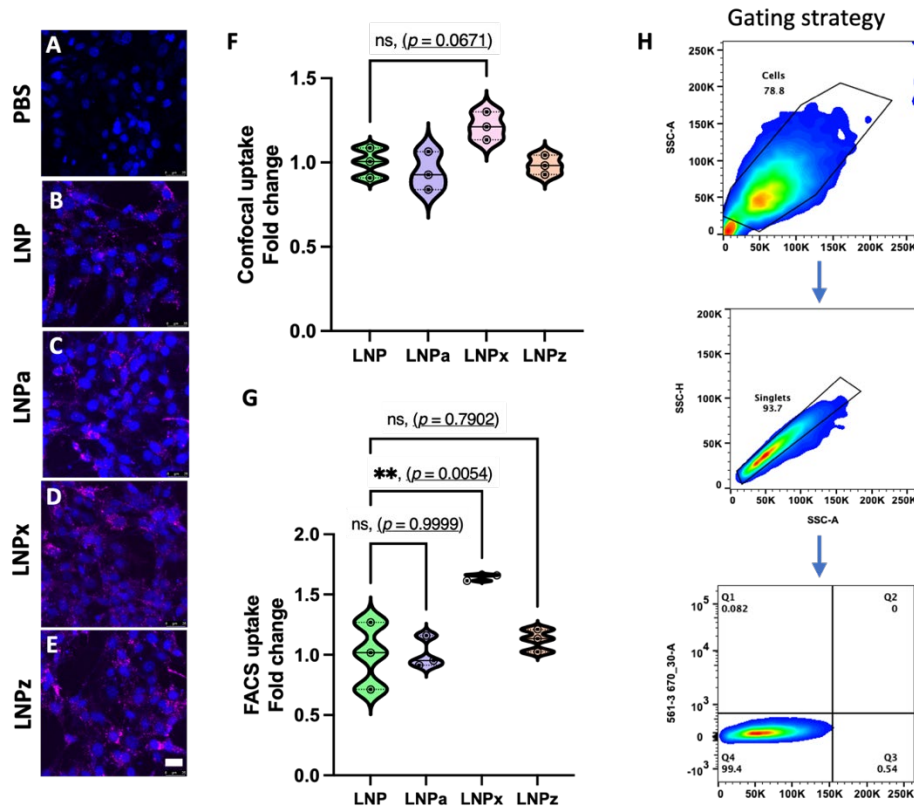

### Supplementary Figure 1. Intracellular uptake of Cy-5 tagged LNP variants. (A-E)

Representative confocal images of 661W cone cells treated with Cy-5 tagged LNP variants at 24 hours treatment. All the cells were treated with Cy5-tagged LNP dose equivalent to 100 ng/well of mRNA cargo (scale bar: 25  $\mu$ m). **(F)** Relative cellular uptake of Cy-5 tagged LNP variants obtained by quantitative FACS estimation of confocal images against unmodified LNP. **(G)** Quantification of cellular uptake using flow cytometry. **(H)** Gating strategy used during cellular uptake study for untreated cells and same strategy was used for other LNP variant treated cells. All data are presented as Mean  $\pm$  SD. An ordinary one-way ANOVA, with Tukey's correction for multiple comparisons test was used for comparisons. Unmodified LNP values were normalized, and fold changes were compared with LNP variants. ns-not significant, \*\* $p < 0.01$ . All representative figures and graphs have  $n = 3$  replicates. Source data are provided as a Source Data file.

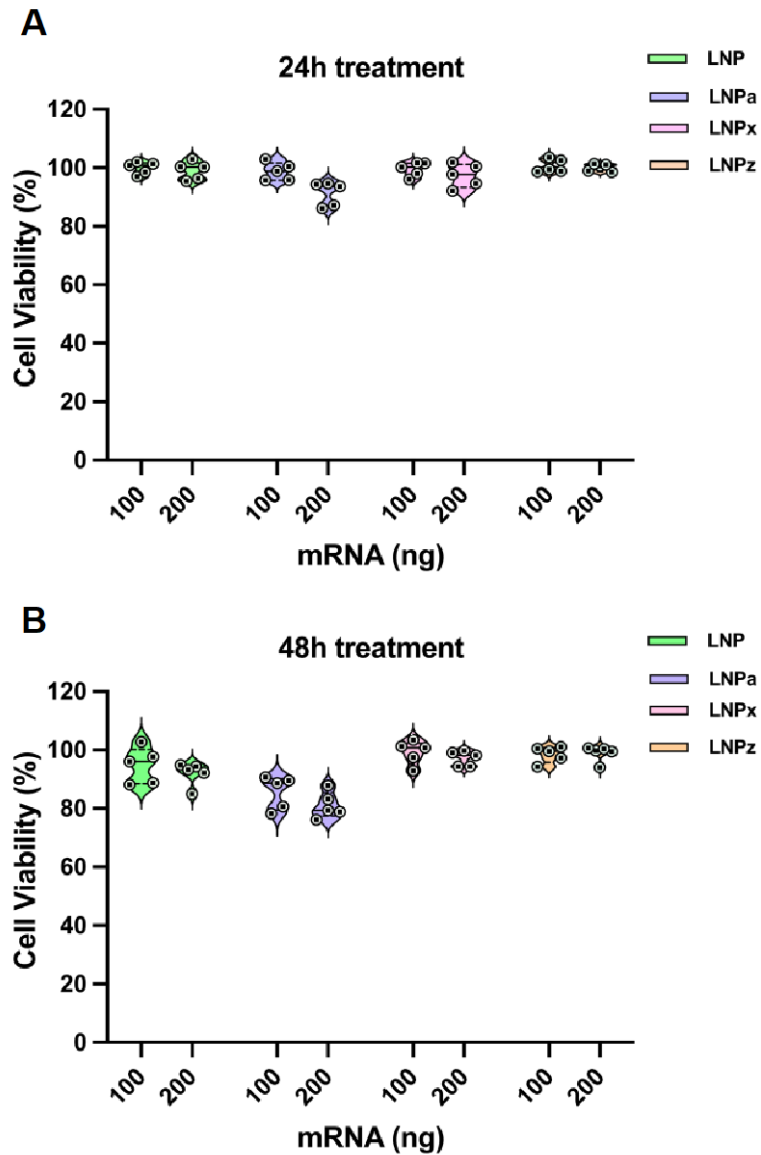

**Supplementary Figure 2. *In-vitro* cell viability assay.** 661w cone cells were treated with LNP variants at a 100 and 200 ng fluc mRNA dose. **(A)** 24 hours post-treatment and **(B)** 48 hours post-treatment. All graphs have n=5 replicates. Source data are provided as a Source Data file.

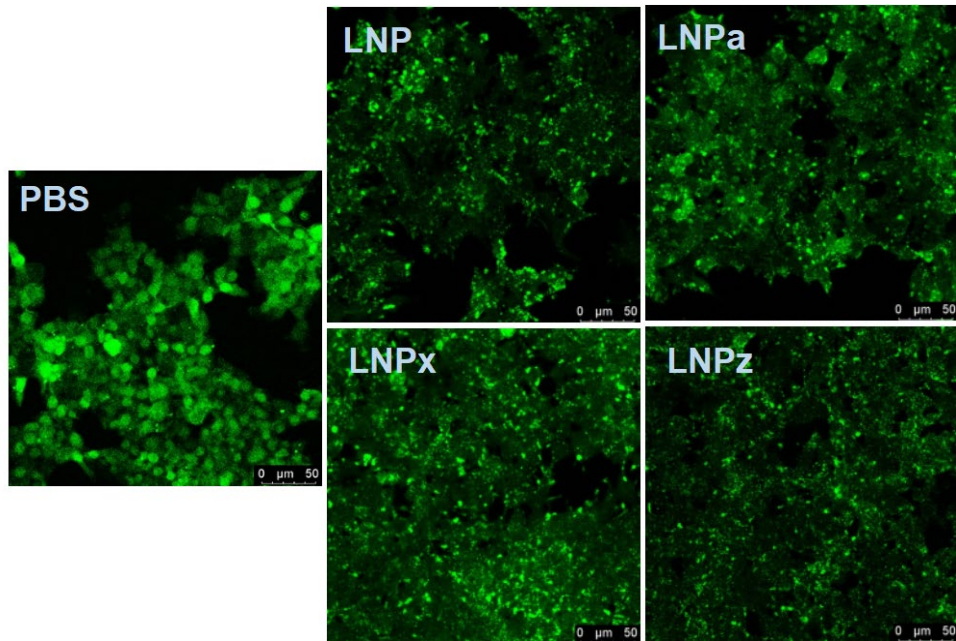

**Supplementary Figure 3. Endosomal escape of LNP variants.** Representative images of the Gal8-GFP reporter cells, 24 hours after *cre* mRNA-loaded LNP variant treatments. All representative figures from n = 3 replicates.

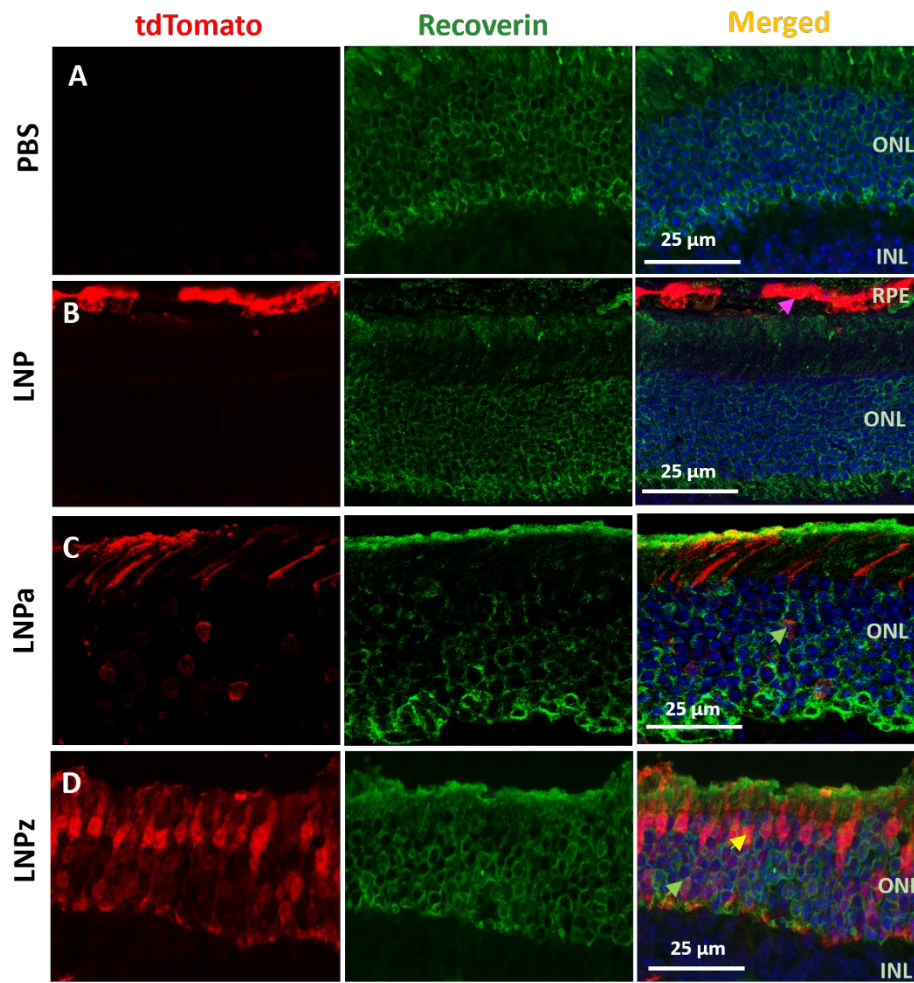

**Supplementary Figure 4. Photoreceptor colocalization study in Ai9 mice. (A-D)**

Representative confocal images showing tdTomato expression in the RPE (LNP) and photoreceptors (LNPa and LNPz), which are colocalized with recoverin. Arrow indicates tdTomato expression (pink: RPE, yellow: cone photoreceptor nuclei, green: rod photoreceptor nuclei). RPE: retinal pigment epithelium, ONL: outer nuclear layer, INL: inner nuclear layer. All representative figures from n = 6 single eyes per group.

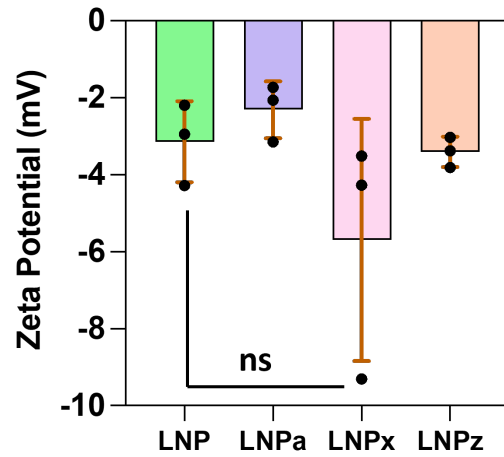

**Supplementary Figure 5.** Zeta potential value from mCherry encapsulated LNP variants measured by Malvern zeta sizer. n=3 LNPs per group. All Data are presented as Mean  $\pm$  SD. An ordinary one-way ANOVA, with Tukey's correction was used for comparison with unmodified LNP. ns-not significant. Source data are provided as a Source Data file.

A) A\*A\*G\*UAAAACCUACUACAAAUGGUUUUAGAGCUAGAAAUAGCAAGUUAA  
 AAUAAGGCUAGUCCGUUAUCAACUUGAAAAAGUGGCACCGAGUCGGUG  
 CU\*U\*U\*U

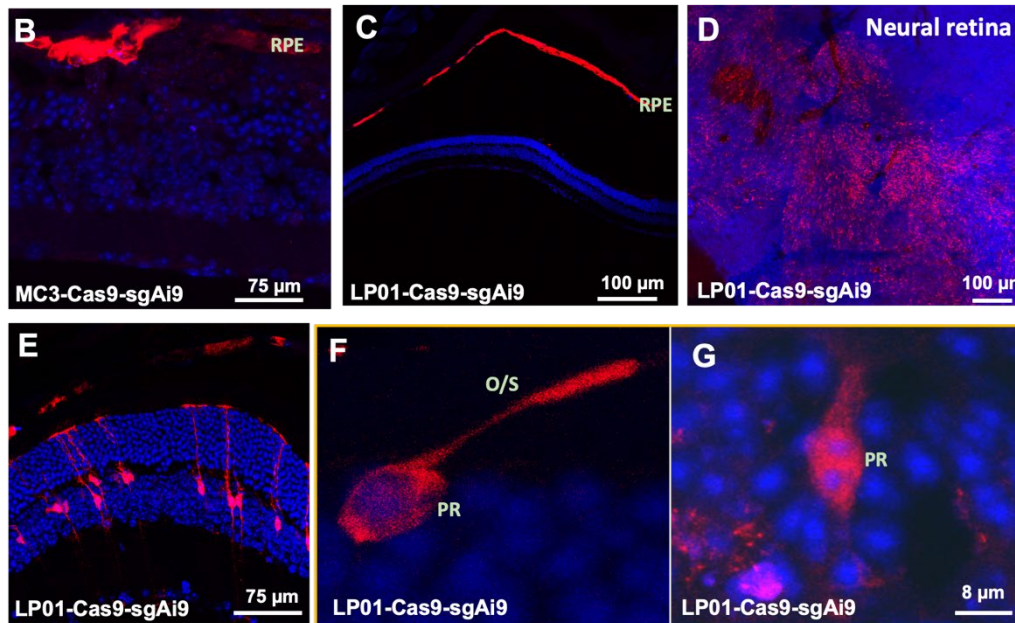

**Supplementary Figure 6. CRISPR-Cas9 delivery and sgRNA modification in Ai9 mice.** (A) sgAi9 guide with modifications highlighted. In the sgRNA structure, the asterisks (blue) and red font indicate the phosphorothioate bond and 2'-O-methyl ribonucleotides, respectively. (B) Representative confocal image showing outer nuclear thinning and disruption 7-days post-subretinal injection with MC3-Cas9-sgAi9-LNPx (n=6 single eyes). (C-G) Representative confocal images showing editing events post-LP01-Cas9-sgAi9-LNPx injection. (C) Retinal cross section highlighting RPE editing (n=6 single eyes). (D) Neural retina flatmount showing tdTomato fluorescence signal within the treated area of the retina (n=9 single eyes). (E) Retinal cross sections highlighting editing in the Müller glia and (F-G) photoreceptors (n=6 single eyes). O/S: outer segment, PR: photoreceptor, RPE: retinal pigment epithelium.

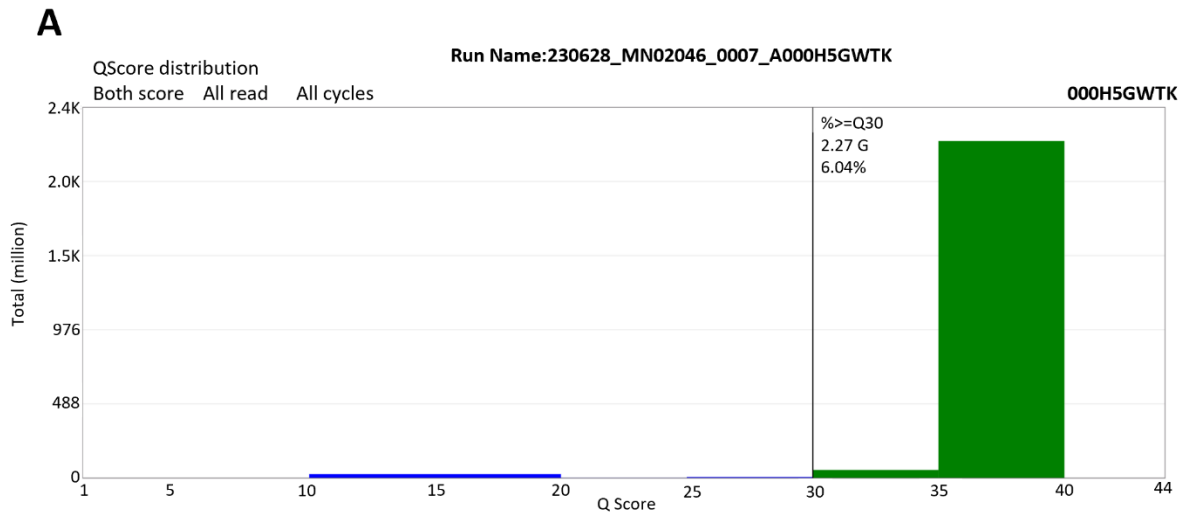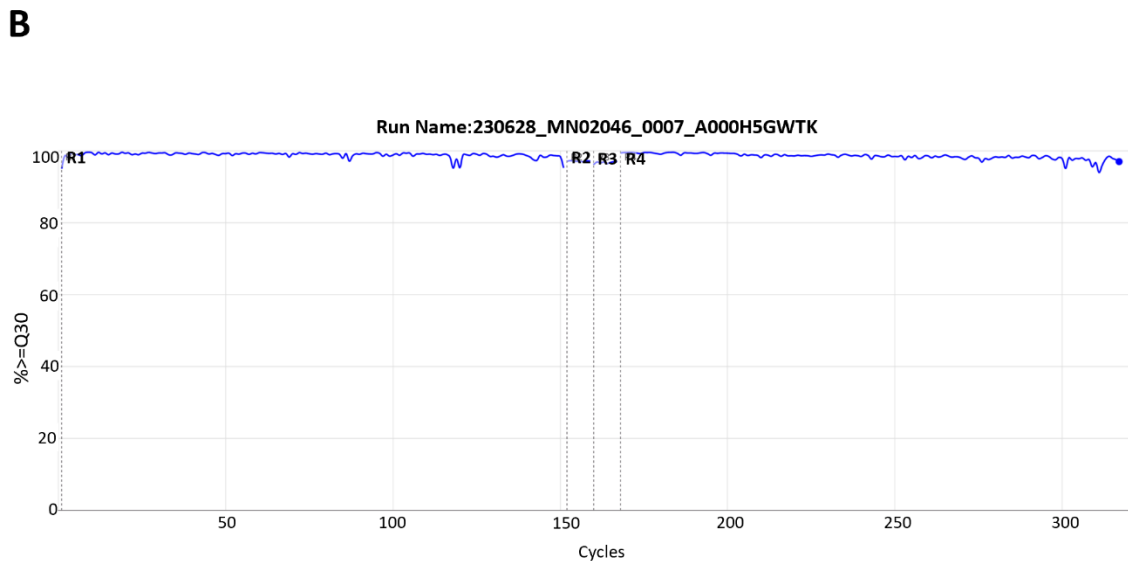

**Supplementary Figure 7. Illumina quality control data from NGS. (A)** QScore distribution indicating high quality sequencing data (over 96% Q30 and above). **(B)** Percentage of bases with  $\geq$  Q30 plotted by cycle showing high accuracy of base call across the whole sequencing run (n=9).



**Supplementary Table 1: Antibodies used for staining**

| <b>S.N.</b> | <b>Primary Antibody</b>           | <b>Host</b> | <b>Dilution</b> |
|-------------|-----------------------------------|-------------|-----------------|
| 1.          | Anti-recoverin (Cat. # AB5585)    | Anti-rabbit | 1:500           |
| 2.          | Anti-mCherry (Cat. # NBP2-25157)  | Anti-rabbit | 1:250           |
| 3.          | Visual Arrestin (E-3) (SC-166388) | Anti-mouse  | 1:100           |

| <b>S.N.</b> | <b>Secondary Antibody</b>                      | <b>Host</b>        | <b>Dilution</b> |
|-------------|------------------------------------------------|--------------------|-----------------|
| 1.          | Alexa Fluor 700-IgG (Cat. # A21038)            | Goat anti-rabbit   | 1:1000          |
| 2.          | Alexa Fluor 594-IgG (H+L) (Cat. # A-21207)     | Donkey anti-rabbit | 1:500           |
| 3.          | Alexa Fluor Plus 488-IgG (H+L) (Cat. # A21038) | Goat anti-mouse    | 1:200           |

**Supplementary Table 2: Guide RNA, primers, and cycling conditions used for editing studies**

| S.N. | sgRNA Name | Sequence             |
|------|------------|----------------------|
| 1.   | sgAi9      | AAGUAAAACCUACAAAUG   |
| 2.   | sgGFP      | CUCGUGACCACCCUGACCUA |

| S.N. | Primer Name  | Sequence (5' -> 3')                                  |
|------|--------------|------------------------------------------------------|
| 1.   | Ai9_NGS_F1_F | ACACTCTTTCCTACACGACGCTCTTCCGATCTATACGAAGTTATTCGCGATG |
| 2.   | Ai9_NGS_F2_F | ACACTCTTTCCTACACGACGCTCTTCCGATCTGTTGTGGTTTGTCCAAAC   |
| 3.   | Ai9_NGS_R    | GACTGGAGTTCAGACGTGTGCTCTTCCGATCTTGTTCAGGTTCAGGGGGAG  |

**Supplementary Table 3: Thermocycling methods for 1<sup>st</sup> PCR for NGS library preparation**

| <b>Step</b>                | <b>Temperature</b> | <b>Time</b> |
|----------------------------|--------------------|-------------|
| Initial Denaturation       | 95.0 °C            | 3 min       |
| 30 Cycles:<br>Denaturation | 98.0 °C            | 20 sec      |
| Annealing                  | 60.0 °C            | 20 sec      |
| Extension                  | 72.0 °C            | 30 sec      |
| Final Extension            | 72.0 °C            | 30 sec      |

**Supplementary Table 4: Thermocycling methods for 2<sup>nd</sup> PCR for NGS library preparation**

| <b>Step</b>                | <b>Temperature</b> | <b>Time</b> |
|----------------------------|--------------------|-------------|
| Initial Denaturation       | 98.0 °C            | 2 min       |
| 12 Cycles:<br>Denaturation | 98.0 °C            | 10 sec      |
| Annealing                  | 62.0 °C            | 20 sec      |
| Extension                  | 72.0 °C            | 30 sec      |
| Final Extension            | 72.0 °C            | 2 min       |
